# Supplementary material for: Room-temperature chemiresistive CO detection by PANi/GO nanocomposite sensors
Source: Royal Society of Chemistry journal article supplement (doi:10.1039/d5ra09053a), 2026-04-17
Supplement: d5ra09053a1.pdf [file d5ra09053a1.pdf]

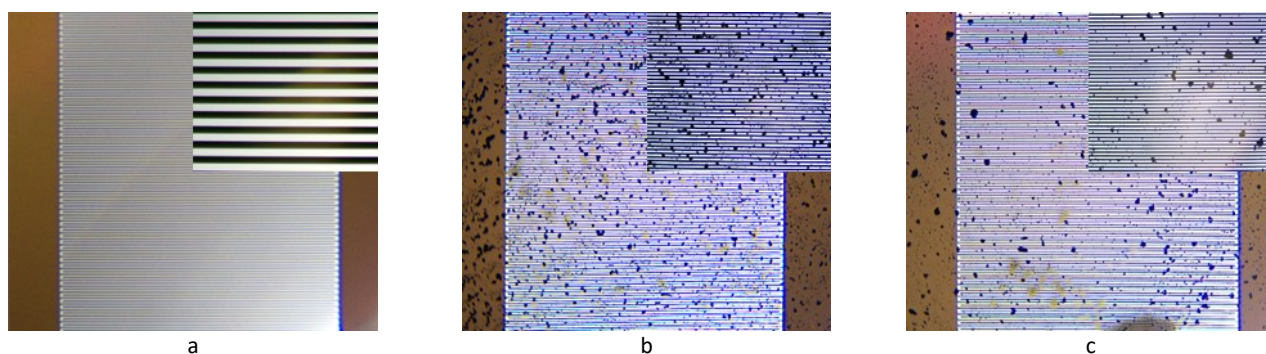

Figure S1. Optical micrographs of the samples before and after deposition of the sensing layer: (a) pristine IDE; (b) IDE coated with PANi; (c) IDE coated with PANi/GO.

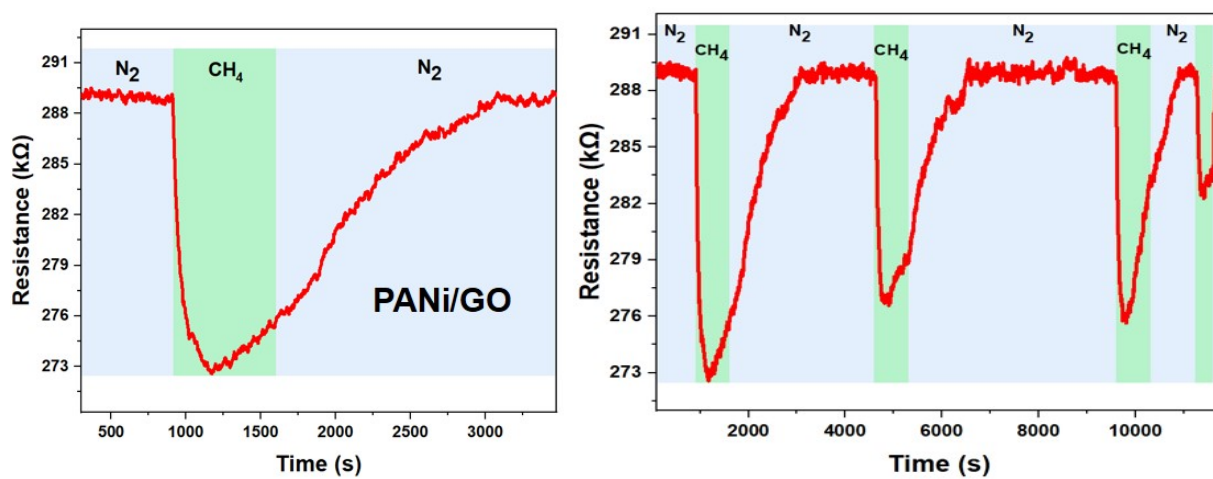

Figure S2. Gas-sensing performance of the PANi/GO composite toward CH<sub>4</sub> at room temperature
